# Supplementary material for: Vanadium-regulated nickel phosphide nanosheets for electrocatalytic sulfion upgrading and hydrogen production
Source: Royal Society of Chemistry journal article supplement (doi:10.1039/d4sc06804a), 2024-11-28
Supplement: d4sc06804a1.pdf [file d4sc06804a1.pdf]

## **Vanadium-regulated nickel phosphide nanosheets for electrocatalytic sulfion upgrading and hydrogen production**

Rui-Qing Li,<sup>\*a</sup> Xiaojun Wang,<sup>a</sup> Shuixiang Xie,<sup>a</sup> Songyun Guo,<sup>a</sup> Zhe Cao,<sup>a</sup> Zhenhao Yan,<sup>a</sup>  
Wei Zhang,<sup>\*a</sup> and Xiaoyu Wan<sup>\*a</sup>

## **Experimental section**

### **Chemicals**

$\text{Ni}(\text{NO}_3)_2 \cdot 6\text{H}_2\text{O}$ ,  $\text{VCl}_3$ ,  $\text{CO}(\text{NH}_2)_2$ ,  $\text{NH}_4\text{F}$  and  $\text{NaH}_2\text{PO}_4 \cdot \text{H}_2\text{O}$  were bought from Aladdin and  $\text{Na}_2\text{S} \cdot 9\text{H}_2\text{O}$  was supplied Sinopharm group.  $\text{NaOH}$  and nickel foam (NF) were supplied by Adamas-beta<sup>®</sup> and Taiyuan source of power company.

### **Synthesis of V-Ni<sub>2</sub>P**

In a typical synthesis, 1.6 mmol  $\text{Ni}(\text{NO}_3)_2$ , 0.4 mmol  $\text{VCl}_3$ , 6 mmol  $\text{NH}_4\text{F}$ , 10 mmol  $\text{CO}(\text{NH}_2)_2$  were dissolved in 35 mL water with stirring, which was transferred to autoclave with the NF put into in the solution. The autoclave was and kept at 120 °C for 6 h in an electric oven to prepare Ni-based layered double hydroxide (NiV LDH) precursor. Then, the NiV LDH precursor and  $\text{NaH}_2\text{PO}_4 \cdot \text{H}_2\text{O}$  were placed in furnace and heated up to 300 °C for 2h to obtain V-Ni<sub>2</sub>P. In contrast, the Ni<sub>2</sub>P, V-Ni<sub>2</sub>P-1 and V-Ni<sub>2</sub>P-2 were synthesized in a similar process without adding  $\text{VCl}_3$  and with adding various molar ratios of Ni and V (9:1, 7:3), respectively.

### **Materials characterization**

The crystalline structures, morphology, element distribution and chemical states of the samples were examined on the X-ray diffraction (XRD, Bruker D8), scanning electron microscopy (SEM, FIB-SEM GX4) equipped with energy dispersive spectroscopy, transmission electron microscopy (TEM, FEI Tecnai G20) and X-ray photoelectron spectrometer (XPS, Thermo ESCALAB 250Xi).

### **Electrochemical measurements**

The electrochemical measurements of the samples were carried out on a CHI 760E electrochemical workstation using synthesized samples as working electrodes in a typical three-electrode system to test the electrochemical performances of HER, OER and SOR. The polarization curves were measured at a scan of 2 mV s<sup>-1</sup> and the electrochemical impedance spectroscopy was performed in the frequency range from 0.01 Hz to 100 kHz.

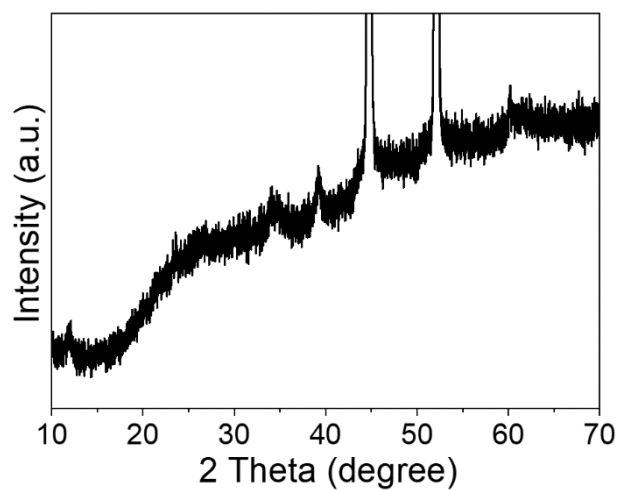

**Fig. S1** XRD pattern of NiV LDH precursor.

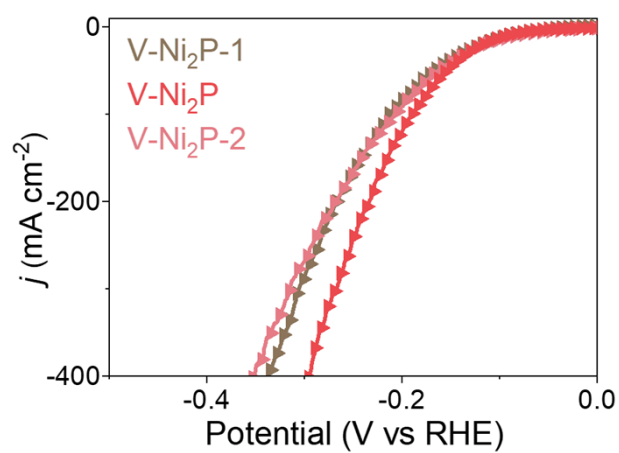

**Fig. S2** LSV curves of V-Ni<sub>2</sub>P-1, V-Ni<sub>2</sub>P and V-Ni<sub>2</sub>P-2 in 1.0 M KOH.

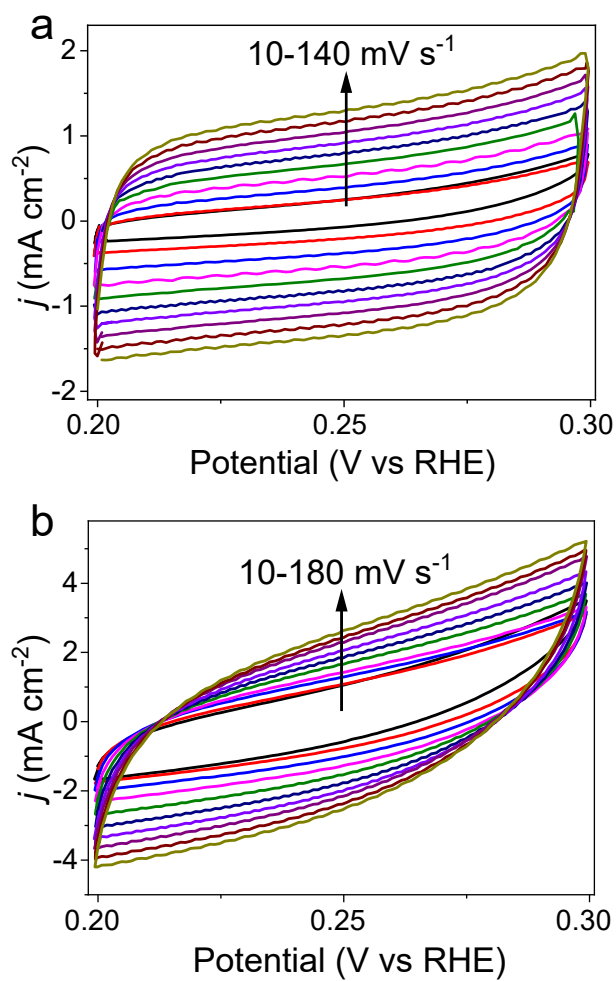

**Fig. S3** Cyclic voltammograms of (a) Ni<sub>2</sub>P and (b) V-Ni<sub>2</sub>P.

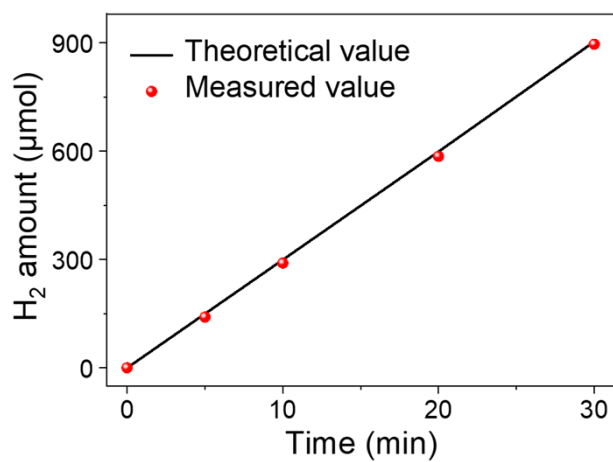

**Fig. S4** Experimental and theoretical calculated amount of H<sub>2</sub> over the V-Ni<sub>2</sub>P.

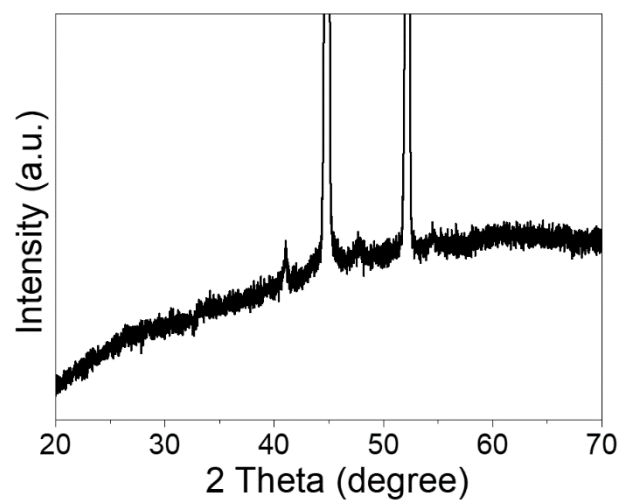

**Fig. S5** XRD pattern of V-Ni<sub>2</sub>P after HER test.

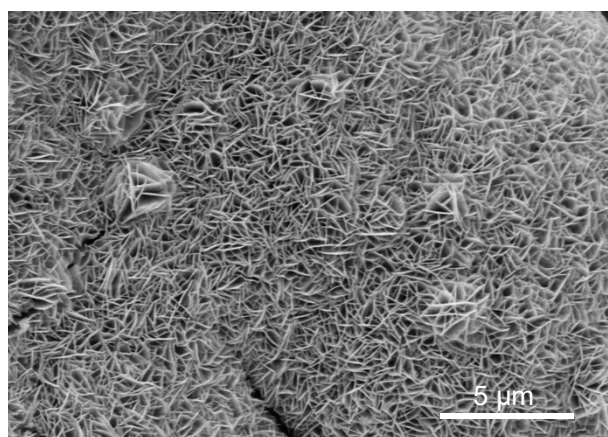

**Fig. S6** SEM image of V-Ni<sub>2</sub>P after HER test.

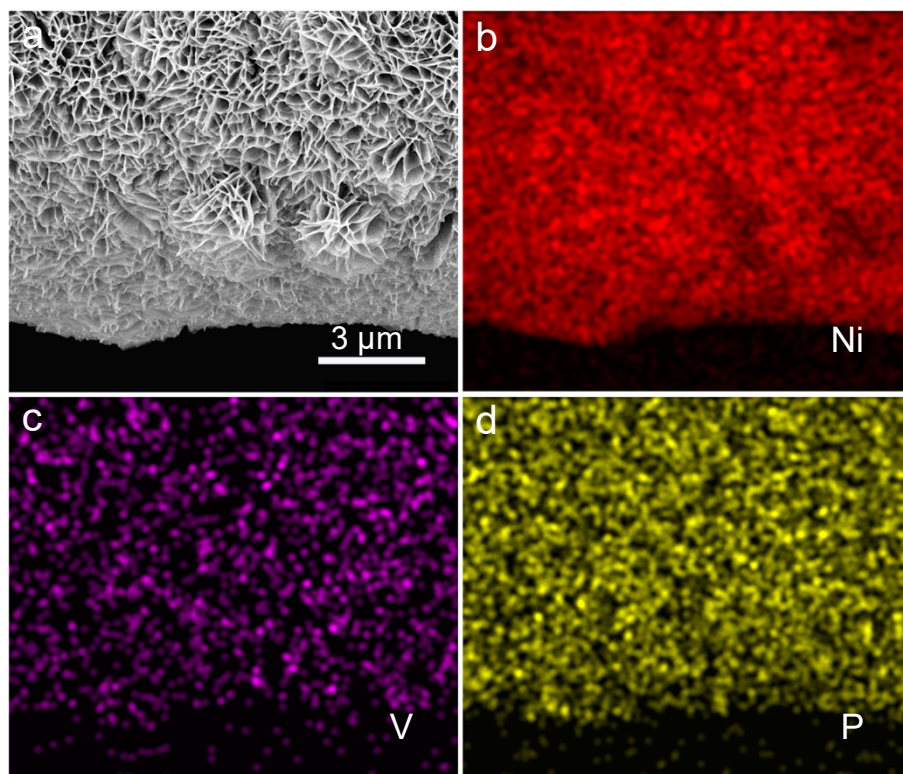

**Fig. S7** SEM and corresponding element mapping images of V-Ni<sub>2</sub>P after HER test.

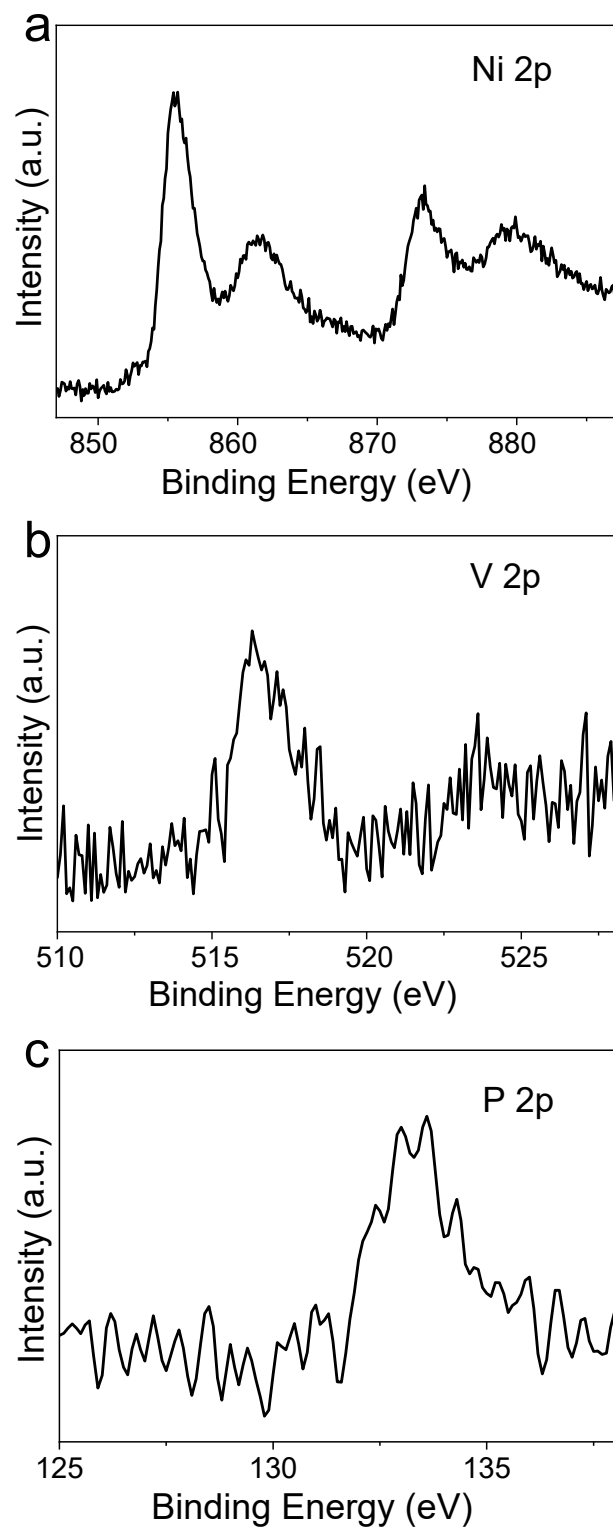

**Fig. S8** XPS spectra of (a) Ni 2p, (b) V 2p and (c) P 2p of V-Ni<sub>2</sub>P after HER test.

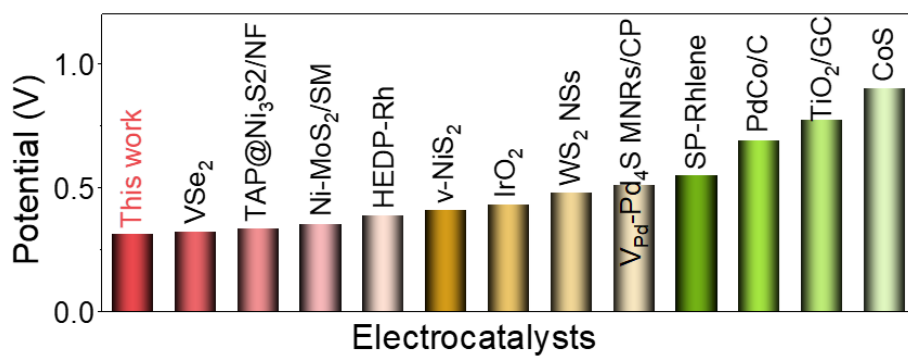

**Fig. S9** Potentials comparison of V-Ni<sub>2</sub>P with reported catalysts.

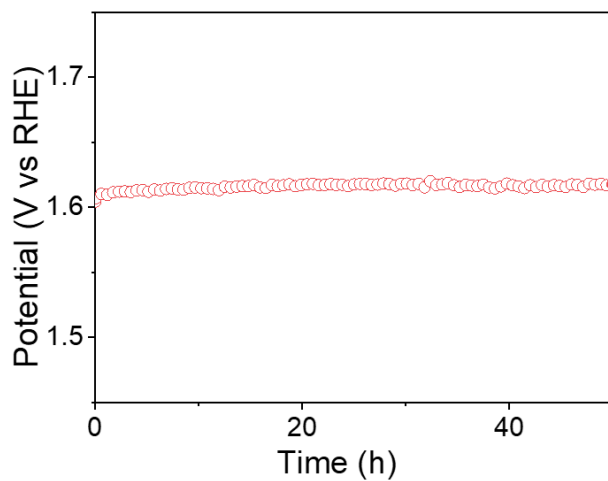

**Fig. S10** Durability test of V-Ni<sub>2</sub>P for OER.



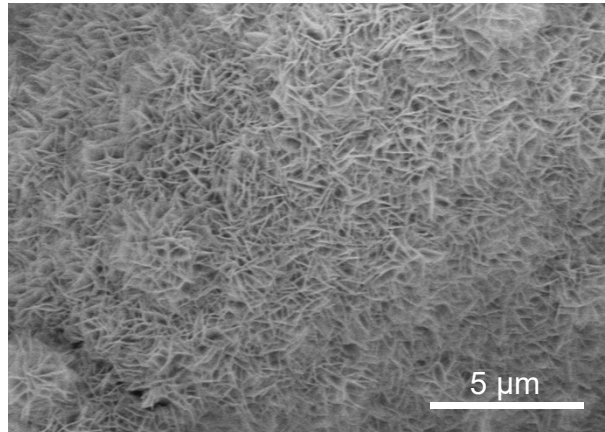

**Fig. S11** SEM image of V-Ni<sub>2</sub>P after OER test.

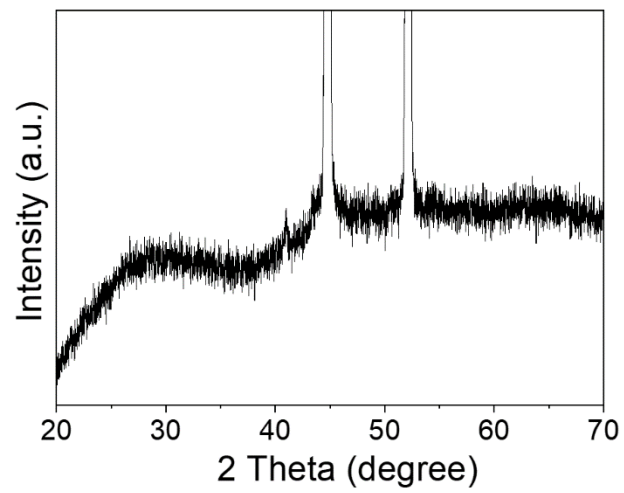

**Fig. S12** XRD pattern of V-Ni<sub>2</sub>P after OER test.

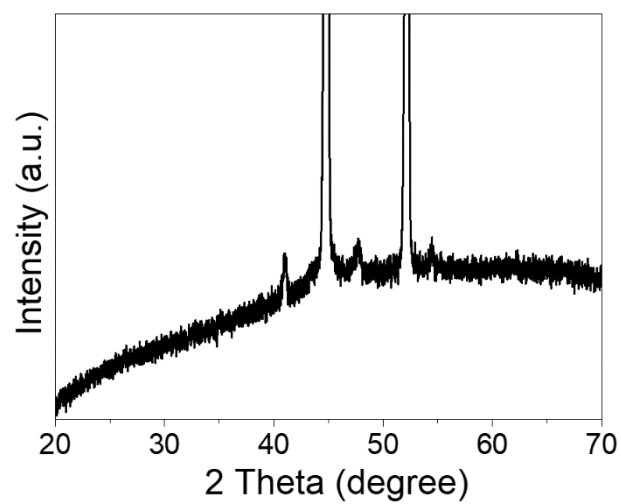

**Fig. S13** XRD pattern of V-Ni<sub>2</sub>P after SOR test.

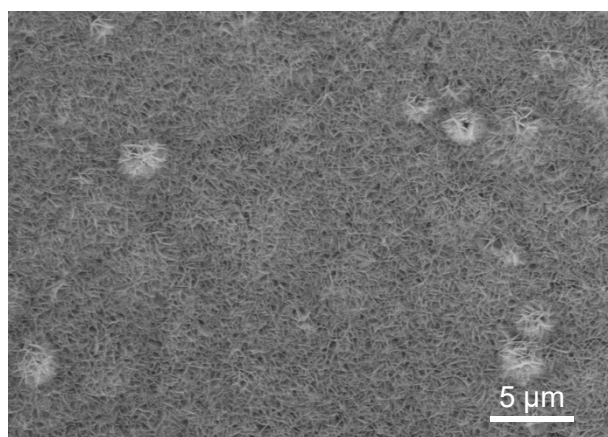

**Fig. S14** SEM image of V-Ni<sub>2</sub>P after SOR test.

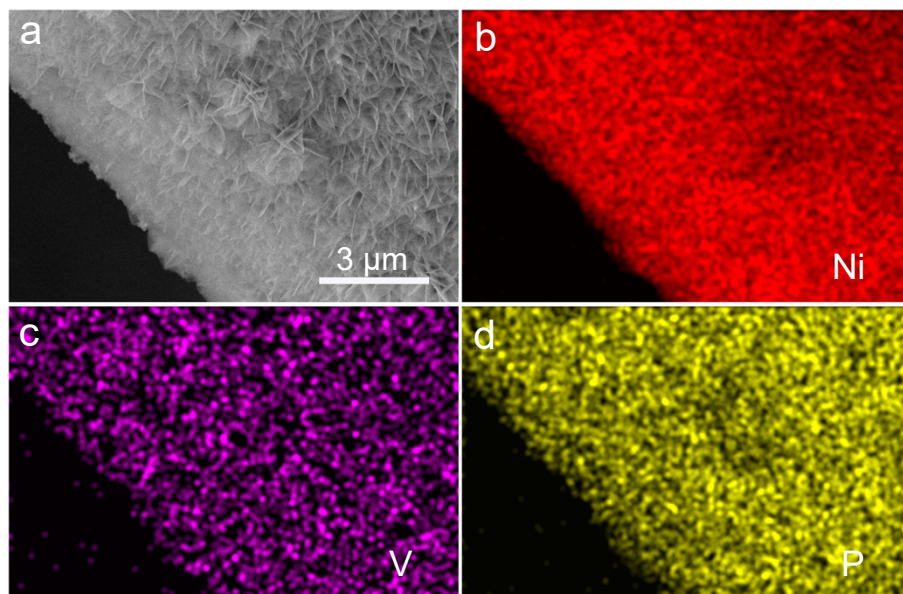

**Fig. S15** SEM and corresponding element mapping images of V-Ni<sub>2</sub>P after SOR test.

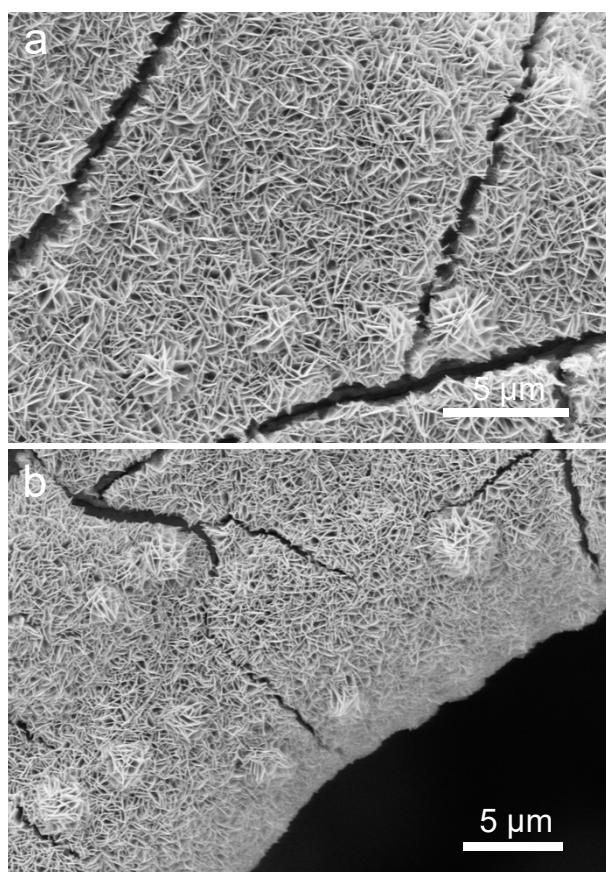

**Fig. S16** SEM image of V-Ni<sub>2</sub>P at the cathode (a) and at the anode (b) after the HWE test.

**Table S1** The comparison of HER performance of V-Ni<sub>2</sub>P with reported catalysts.

| Catalysts                                             | Overpotential at 10 mA<br>cm <sup>-2</sup> (mV) | Reference        |
|-------------------------------------------------------|-------------------------------------------------|------------------|
| <b>V-Ni<sub>2</sub>P</b>                              | <b>93</b>                                       | <b>This work</b> |
| Ni <sub>2</sub> P/CoN-PCP                             | 94                                              | S1               |
| Ni-FeP/C                                              | 95                                              | S2               |
| Mo,Fe-NiCoP <sub>x</sub> /NF                          | 99                                              | S3               |
| Ni-N <sub>3</sub>                                     | 103                                             | S4               |
| O <sub>3</sub> -V <sub>10</sub> -Ni <sub>2</sub> P    | 108                                             | S5               |
| Fe(OH) <sub>x</sub> @Cu-MOF                           | 112                                             | S6               |
| NiFeP/SG                                              | 115                                             | S7               |
| Ti <sub>3</sub> CN(OH) <sub>x</sub> @MoS <sub>2</sub> | 120                                             | S8               |
| Al-Ni <sub>2</sub> P/TM                               | 129                                             | S9               |
| Cu@Co-CoO/Rh                                          | 137.7                                           | S10              |
| MoS <sub>2</sub> /CeO <sub>2</sub>                    | 147                                             | S11              |
| 1T-MoS <sub>2</sub>                                   | 158                                             | S12              |
| CoP                                                   | 173                                             | S13              |
| Ni-Mo <sub>2</sub> C/NPC                              | 183                                             | S14              |
| MoS <sub>2</sub> @FePS <sub>3</sub>                   | 196                                             | S15              |
| WS <sub>2</sub> -NSs                                  | 214                                             | S16              |
| Cu-CoFe/Co/NC                                         | 217                                             | S17              |
| H-TaS <sub>2</sub>                                    | 230                                             | S18              |
| MoS <sub>2</sub>                                      | 248                                             | S19              |
| Ni <sub>1.5</sub> Fe <sub>0.5</sub> P                 | 282                                             | S20              |

**Table S2** The comparison of SOR performance of V-Ni<sub>2</sub>P with reported catalysts.

| <b>Catalysts</b>                           | <b>Potential (V) at 10 mA cm<sup>-2</sup></b> | <b>Reference</b> |
|--------------------------------------------|-----------------------------------------------|------------------|
| <b>V-Ni<sub>2</sub>P</b>                   | <b>0.313</b>                                  | <b>This work</b> |
| VSe <sub>2</sub>                           | 0.32                                          | S21              |
| TAP@Ni <sub>3</sub> S <sub>2</sub> /NF     | 0.335                                         | S22              |
| Ni-MoS <sub>2</sub> /SM                    | 0.35                                          | S23              |
| HEDP-Rh                                    | 0.385                                         | S24              |
| v-NiS <sub>2</sub>                         | 0.41                                          | S25              |
| IrO <sub>2</sub>                           | 0.43                                          | S26              |
| WS <sub>2</sub> NSs                        | 0.48                                          | S27              |
| V <sub>Pd</sub> -Pd <sub>4</sub> S MNRs/CP | 0.511                                         | S28              |
| SP-Rhlene                                  | 0.550                                         | S29              |
| PdCo/C                                     | 0.69                                          | S30              |
| TiO <sub>2</sub> /GC                       | 0.77                                          | S31              |
| CoS                                        | 0.9                                           | S32              |

**Table S3** The comparison of HWE performance of V-Ni<sub>2</sub>P with reported catalysts.

| Catalysts               | Voltage at 10 mA cm <sup>-2</sup> (V) | Reference |
|-------------------------|---------------------------------------|-----------|
| V-Ni <sub>2</sub> P     | 0.389                                 | This work |
| Cu <sub>2</sub> S/NF    | 0.43                                  | S33       |
| a-RhS <sub>2-x</sub>    | 0.442                                 | S34       |
| v-NiS <sub>2</sub>      | 0.49                                  | S25       |
| Ni-MoS <sub>2</sub> /SM | 0.49                                  | S23       |
| CoS/MoS <sub>2</sub>    | 0.528                                 | S35       |
| HEDP-Rh                 | 0.585                                 | S24       |
| WS <sub>2</sub> NSs     | 1.17                                  | S27       |
| CoP/NF                  | 1.27                                  | S36       |

## References

1. T. Sun, S. Zhang, L. Xu, D. Wang and Y. Li, *Chem. Commun.*, 2018, **54**, 12101.
2. X. F. Lu, L. Yu and X. Lou, *Sci. Adv.*, 2019, **5**, eaav6009.
3. X. An, L. Quan, J. Liu, Q. Tang, H. Lan and H. Liu, *J. Colloid Interf. Sci.*, 2022, **615**, 456.
4. W. Zang, T. Sun, T. Yang, S. Xi, M. Waqar, Z. Kou, Z. Lyu, Y. Feng, J. Wang and S. Pennycook, *Adv. Mater.*, 2021, **33**, 2003846.
5. K. N. Dinh, X. Sun, Z. Dai, Y. Zheng, P. Zheng, J. Yang, J. Xu, Z. Wang and Q. Yan, *Nano Energy*, 2018, **54**, 82.
6. W. Cheng, H. Zhang, D. Luan and X. Lou, *Sci. Adv.*, 2021, **7**, 2580.
7. R. Li, B. Wang, T. Gao, R. Zhang, C. Xu, X. Jiang, J. Zeng, Y. Bando, P. Hu, Y. Li and X. Wang, *Nano Energy*, 2019, **58**, 870.
8. J. Jiang, F. Li, S. Bai, Y. Wang, K. Xiang, H. Wang, J. Zou and J. Hsu, *Nano Res.*, 2023, **16**, 4656.
9. H. Du, L. Xia, S. Zhu, F. Qu and F. Qu, *Chem. Commun.*, 2018, **54**, 2894.
10. P. Tran, D. Tran, D. Malhotra, S. Prabhakaran, D. Kim, N. Kim and J. Lee, *Small*, 2021, **17**, 2103826.

11. R. Li, C. Wang, S. Xie, T. Hang, X. Wan, J. Zeng and W. Zhang, *Chem. Commun.*, 2023, **59**, 11512.
12. Guo, E. Song, W. Zhao, S. Xu, W. Zhao, Y. Lei, Y. Fang, J. Liu and F. Huang, *Nat. Commun.*, 2022, **13**, 5954.
13. J. Xie, H. Liu, Y. Zhen, Y. Dong, R. Luan, N. Yu, D. Liu, Y. Chai and B. Dong, *J. Colloid Interf. Sci.*, 2022, **614**, 84.
14. Y. Lu, C. Yue, Y. Li, W. Bao, X. Guo, W. Yang, Z. Liu, P. Jiang, W. Yan, S. Liu, Y. Pan and Y. Liu, *Appl. Catal. B-Environ.*, 2021, **296**, 120336.
15. C. Du, K. Dinh, Q. Liang, Y. Zheng, Y. Luo, J. Zhang and Q. Yan, *Adv. Energy Mater.*, 2018, **8**, 1801127.
16. L. Yi, Y. Ji, P. Shao, J. Chen, J. Li, H. Li, K. Chen, X. Peng and Z. Wen, *Angew. Chem. Int. Ed.*, 2021, **60**, 21550.
17. X. Liu, H. Mao, G. Liu, Q. Yu, S. Wu, B. Li, G. Zhou, Z. Li and L. Wang, *Chem. Eng. J.*, 2023, **451**, 138699.
18. L. Najafi, S. Bellani, R. Oropesa-Nuñez, B. Martín-García, M. Prato, L. Pasquale, J. Panda, P. Marvan, Z. Sofer and F. Bonaccorso, *ACS Catal.*, 2020, **10**, 3313.
19. B. Chen, P. Hu, F. Yang, X. Hua, F. Yang, F. Zhu, R. Sun, K. Hao and Z. Yin, *Small*, 2023, **19**, 2207177.
20. H. Huang, C. Yu, C. Zhao, X. Han, J. Yang, Z. Liu, S. Li, M. Zhang and J. Qiu, *Nano Energy*, 2017, **34**, 472.
21. W. Feng, M. Cheng, R. Du, Y. Wang, P. Wang, H. Li, L. Song, X. Wen, J. Yang, X. Li, J. He and J. Shi, *Adv. Mater. Interfaces*, 2022, **9**, 2200060.
22. C. Chen, L. Hu, X. Liu, Y. Ding, J. He, H. Li, N. Li, D. Chen, Q. Xu and J. Lu, *Appl. Surf. Sci.*, 2022, **605**, 154756.
23. F. Liu, X. Cai, Y. Tang, W. Liu, Q. Chen, P. Dong, M. Xu, Y. Tan and S. Bao, *Energy Environ. Mater.*, 2024, **7**, e12644.
24. Z. Wang, G. Yang, P. Tian, X. Li, K. Deng, H. Yu, Y. Xu, H. Wang and L. Wang, *Chem. Eng. J.*, 2023, **473**, 145147.
25. S. Zhang, Q. Zhou, Z. Shen, X. Jin, Y. Zhang, M. Shi, J. Zhou, J. Liu, Z. Lu, Y. Zhou and H. Zhang, *Adv. Funct. Mater.*, 2021, **31**, 2101922.

26. M. Zhang, J. Guan, Y. Tu, S. Chen, Y. Wang, S. Wang, L. Yu, C. Ma, D. Deng and X. Bao, *Energy Environ. Sci.*, 2020, **13**, 119.
27. L. Yi, Y. Ji, P. Shao, J. Chen, J. Li, H. Li, K. Chen, X. Peng and Z. Wen, *Angew. Chem. Int. Ed.*, 2021, **60**, 21550.
28. W. Wang, Q. Mao, S. Jiang, K. Deng, H. Yu, Z. Wang, Y. Xu, L. Wang and H. Wang, *Appl. Catal. B-Environ.*, 2024, **340**, 123194.
29. H. Wang, Y. Liang, S. Liu, X. Mu, H. Yu, K. Deng, Z. Wang, Y. Xu and L. Wang, *Inorg. Chem. Front.*, 2023, **10**, 5686.
30. K. Kim and J. Han, *Int. J. Hydrogen Energy*, 2015, **40**, 4567.
31. P. Sahoo, K. Kim, J. Lee, J. Han and Y. Oh, *ACS Sustain. Chem. Eng.*, 2015, **3**, 1764.
32. K. Kim, J. Son and J. Han, *Int. J. Hydrogen Energy*, 2014, **39**, 10493.
33. Y. Pei, J. Cheng, H. Zhong, Z. Pi, Y. Zhao and F. Jin, *Green Chem.*, 2021, **23**, 6975.
34. Q. Mao, X. Mu, K. Deng, H. Yu, Z. Wang, Y. Xu, X. Li, L. Wang and H. Wang, *ACS Nano*, 2023, **17**, 790.
35. K. Gao, M. Zhou, Y. Liu, S. Wang, R. Fu, Z. Wang, J. Guo, Z. Liu, H. Wang, Y. Zhao and Q. Wang, *J. Colloid Interf. Sci.*, 2024, **657**, 290.
36. S. Hao, L. Yang, D. Liu, G. Du, Y. Yang, A.M. Asiri and X. Sun, *Int. J. Hydrogen Energy*, 2017, **42**, 26289.
